# Supplementary material for: Exclusive Fish Oil Lipid Emulsion Rescue Strategy Improves Cholestasis in Neonates on Partially Fish Oil-Based Lipid Emulsion: A Pilot Study
Source: MDPI journal article supplement (doi:10.3390/nu15030509), 2023-01-18
Supplement: s1 [file s1]

**Table S1.** Neonate primary diagnoses, FOLE administration and outcomes.

| ID | Gestational age<br>(weeks+days) | Birth weight<br>(grams) | Primary diagnosis                           | FOLE initiated<br>(DOL) | Days on<br>FOLE | Cholestasis<br>resolution | Cholestasis resolution<br>(days after FOLE initiation) |
|----|---------------------------------|-------------------------|---------------------------------------------|-------------------------|-----------------|---------------------------|--------------------------------------------------------|
| 1  | 23+6                            | 702                     | Meconium ileus<br>NEC                       | 38                      | 121             | Yes                       | 120                                                    |
| 2  | 24+1                            | 697                     | Fungal sepsis                               | 42                      | 6               | No                        | -                                                      |
| 3  | 24+3                            | 645                     | NEC                                         | 29                      | 11              | No                        | -                                                      |
| 4  | 24+3                            | 736                     | NEC                                         | 41                      | 22              | No                        | -                                                      |
| 5  | 25+2                            | 487                     | Hepatic hematoma                            | 10                      | 40              | Yes                       | 40                                                     |
| 6  | 25+2                            | 686                     | Intestinal obstruction                      | 30                      | 11              | Yes                       | 14                                                     |
| 7  | 25+6                            | 939                     | NEC                                         | 54                      | 8               | Yes                       | 20                                                     |
| 8  | 26+0                            | 910                     | Intestinal atresia                          | 94                      | 12              | Yes                       | 71                                                     |
| 9  | 26+6                            | 731                     | Intestinal obstruction                      | 25                      | 47              | Yes                       | 48                                                     |
| 10 | 27+0                            | 905                     | NEC                                         | 26                      | 79              | Yes                       | 42                                                     |
| 11 | 27+0                            | 644                     | Meconium ileus                              | 21                      | 4               | yes                       | 18                                                     |
| 12 | 27+2                            | 1130                    | NEC                                         | 48                      | 73              | No                        | -                                                      |
| 13 | 27+3                            | 900                     | NEC                                         | 61                      | 48              | Yes                       | 50                                                     |
| 14 | 27+4                            | 919                     | Intestinal perforation                      | 26                      | 90              | Yes                       | 120                                                    |
| 15 | 27+4                            | 830                     | NEC                                         | 52                      | 49              | No                        | -                                                      |
| 16 | 27+6                            | 455                     | Sepsis                                      | 53                      | 5               | No                        | -                                                      |
| 17 | 28+0                            | 991                     | NEC                                         | 51                      | 52              | Yes                       | 29                                                     |
| 18 | 29+5                            | 1740                    | Polymalformative syndrome                   | 14                      | 6               | Yes                       | 64                                                     |
| 19 | 30.6                            | 1820                    | NEC                                         | 8                       | 75              | Yes                       | 78                                                     |
| 20 | 31+2                            | 1952                    | NEC                                         | 25                      | 69              | Yes                       | 64                                                     |
| 21 | 31+6                            | 1650                    | NEC                                         | 57                      | 40              | Yes                       | 31                                                     |
| 22 | 32+0                            | 2300                    | Volvulus                                    | 36                      | 31              | Yes                       | 32                                                     |
| 23 | 32+0                            | 765                     | Meconium ileus                              | 10                      | 37              | Yes                       | 41                                                     |
| 24 | 33+2                            | 2374                    | Intestinal atresia                          | 6                       | 63              | Yes                       | 34                                                     |
| 25 | 33+4                            | 2300                    | Neck-chest mesenchymal tumor                | 28                      | 15              | No                        | -                                                      |
| 26 | 33+5                            | 2400                    | Hepatic hemangioendothelioma                | 21                      | 27              | Yes                       | 70                                                     |
| 27 | 33+6                            | 650                     | Intestinal perforation                      | 41                      | 46              | Yes                       | 11                                                     |
| 28 | 33+6                            | 2500                    | Gastroschisis with intestinal atresia       | 19                      | 95              | Yes                       | 23                                                     |
| 29 | 34+3                            | 2290                    | Congenital Diaphragmatic Hernia             | 20                      | 7               | No                        | -                                                      |
| 30 | 35+0                            | 1750                    | Gastroschisis; intestinal atresia; volvulus | 20                      | 51              | Yes                       | 180                                                    |

|    |      |      |                                                           |    |    |     |    |
|----|------|------|-----------------------------------------------------------|----|----|-----|----|
| 31 | 35+1 | 3410 | Hepatoblastoma                                            | 7  | 23 | Yes | 98 |
| 32 | 35+4 | 2245 | Duodenal atresia                                          | 17 | 47 | Yes | 56 |
| 33 | 36+4 | 2200 | Omphalopagus twin (biliary atresia)                       | 7  | 96 | No  | -  |
| 34 | 36+4 | 2200 | Omphalopagus twin<br>(Intestinal atresia and perforation) | 12 | 23 | Yes | 21 |
| 35 | 3+6  | 2330 | Viral hepatitis                                           | 13 | 4  | Yes | 46 |
| 36 | 37+1 | 2470 | Hirschsprung disease                                      | 9  | 10 | Yes | 9  |
| 37 | 38+4 | 3290 | Sepsis                                                    | 26 | 24 | Yes | 23 |
| 38 | 39+4 | 3025 | Shone complex                                             | 40 | 50 | No  | -  |

DOL = day of life; FOLE = 100% fish oil-based lipid emulsion; NEC = necrotizing enterocolitis
